# Supplementary material for: Modeling of PAHs From Global to Regional Scales: Model Development and Investigation of Health Risks from 2013 to 2018 in China
Source: Copernicus journal article supplement (doi:10.5194/egusphere-2024-1437), 2024-07-02
Supplement: Supplementary file [file egusphere-2024-1437-AC3-supplement.pdf]

## **Response to Editor:**

**Comment 1:** The main paper must give the model name and version number (or other unique identifier) in the title.

**Response:** Thanks for your reminder. Considering the PAH module coupled into the IAP-AACM v1.0 model (Wei et al., 2019) in this paper, the title is modified to “Modeling of PAHs From Global to Regional Scales: Model Development (IAP-AACM\_PAH v1.0) and Investigation of Health Risks in 2013 and 2018 in China” in the revised manuscript (seen in the title in the revised manuscript).

## **References**

Wei, Y., Chen, X.S., Chen, H.S., Li, J., Wang, Z.F., Yang, W.Y., Ge, B.Z., Du, H.Y., Hao, J.Q., Wang, W., Li, J.J., Sun, Y.L., Huang, H.L.: IAP-AACM v1.0: a global to regional evaluation of the atmospheric chemistry model in CAS-ESM. *Atmospheric Chemistry and Physics*, 19, 8269-8296, <https://doi.org/10.5194/acp-19-8269-2019>, 2019.
